# Supplementary material
Source: PubMed Central journal article supplement (PMC8102582)
Supplement: 41437_2021_408_MOESM1_ESM.pdf [file 41437_2021_408_MOESM1_ESM.pdf]

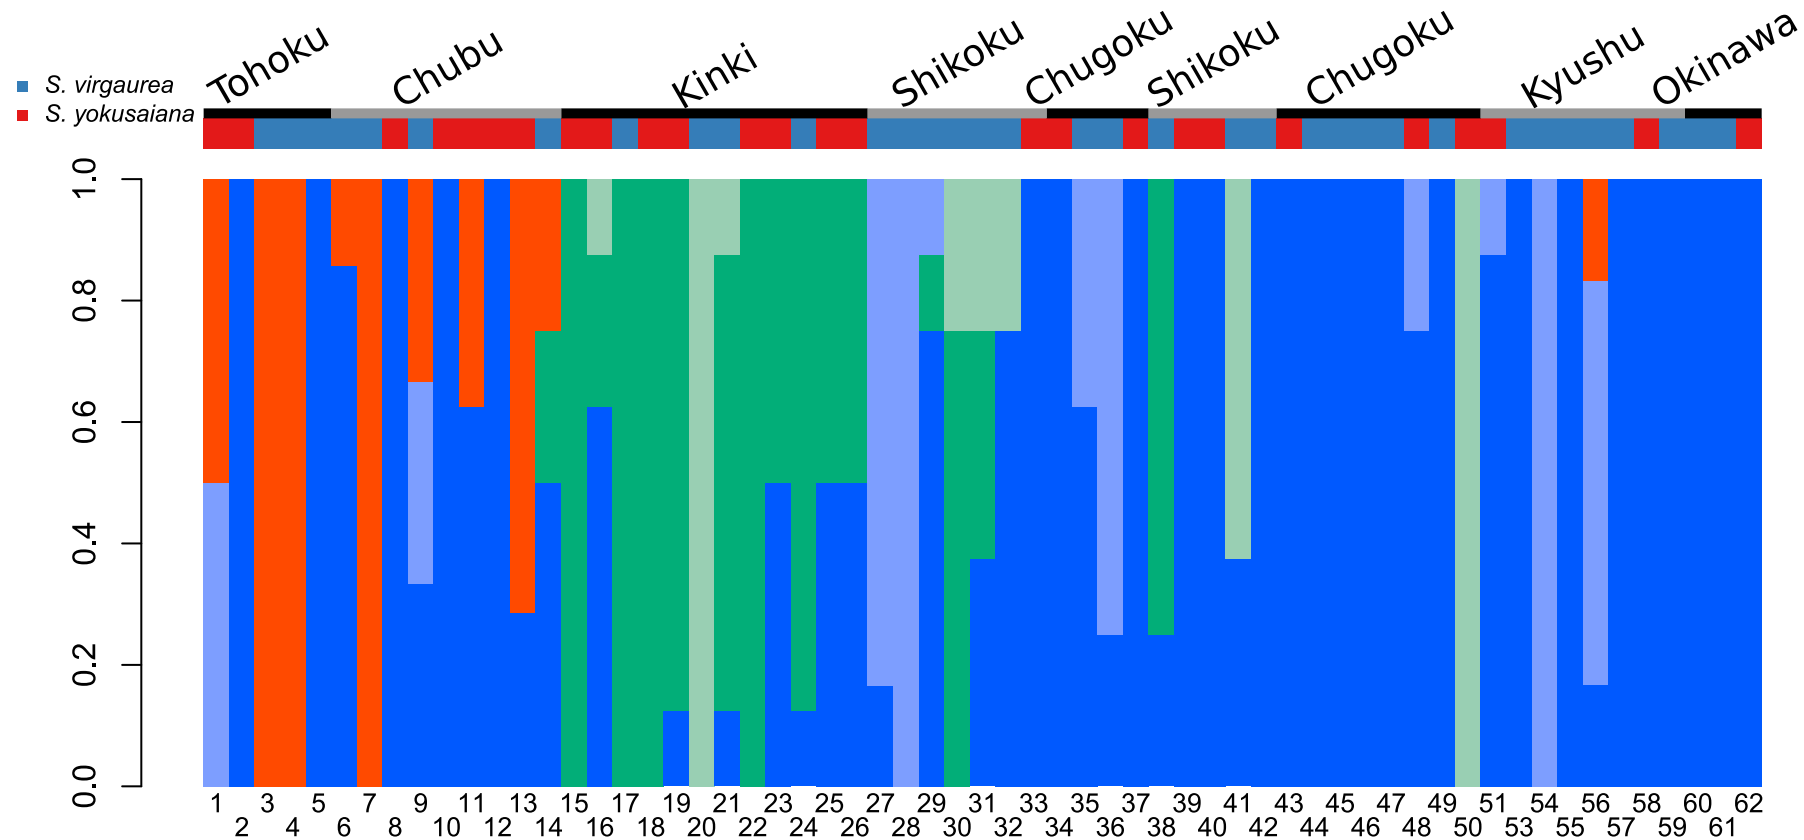

**Fig. S1** Bar plot of the chloroplast haplotypes in each population. The upper rectangles indicate where populations sampled. The middle rectangles indicate *S. virgaurea* (red) and *S. yokusaiana* (blue). The colors of the lower bar plot correspond to the colors in Fig. 3a.

### Mismatch distribution (demographic expansion)

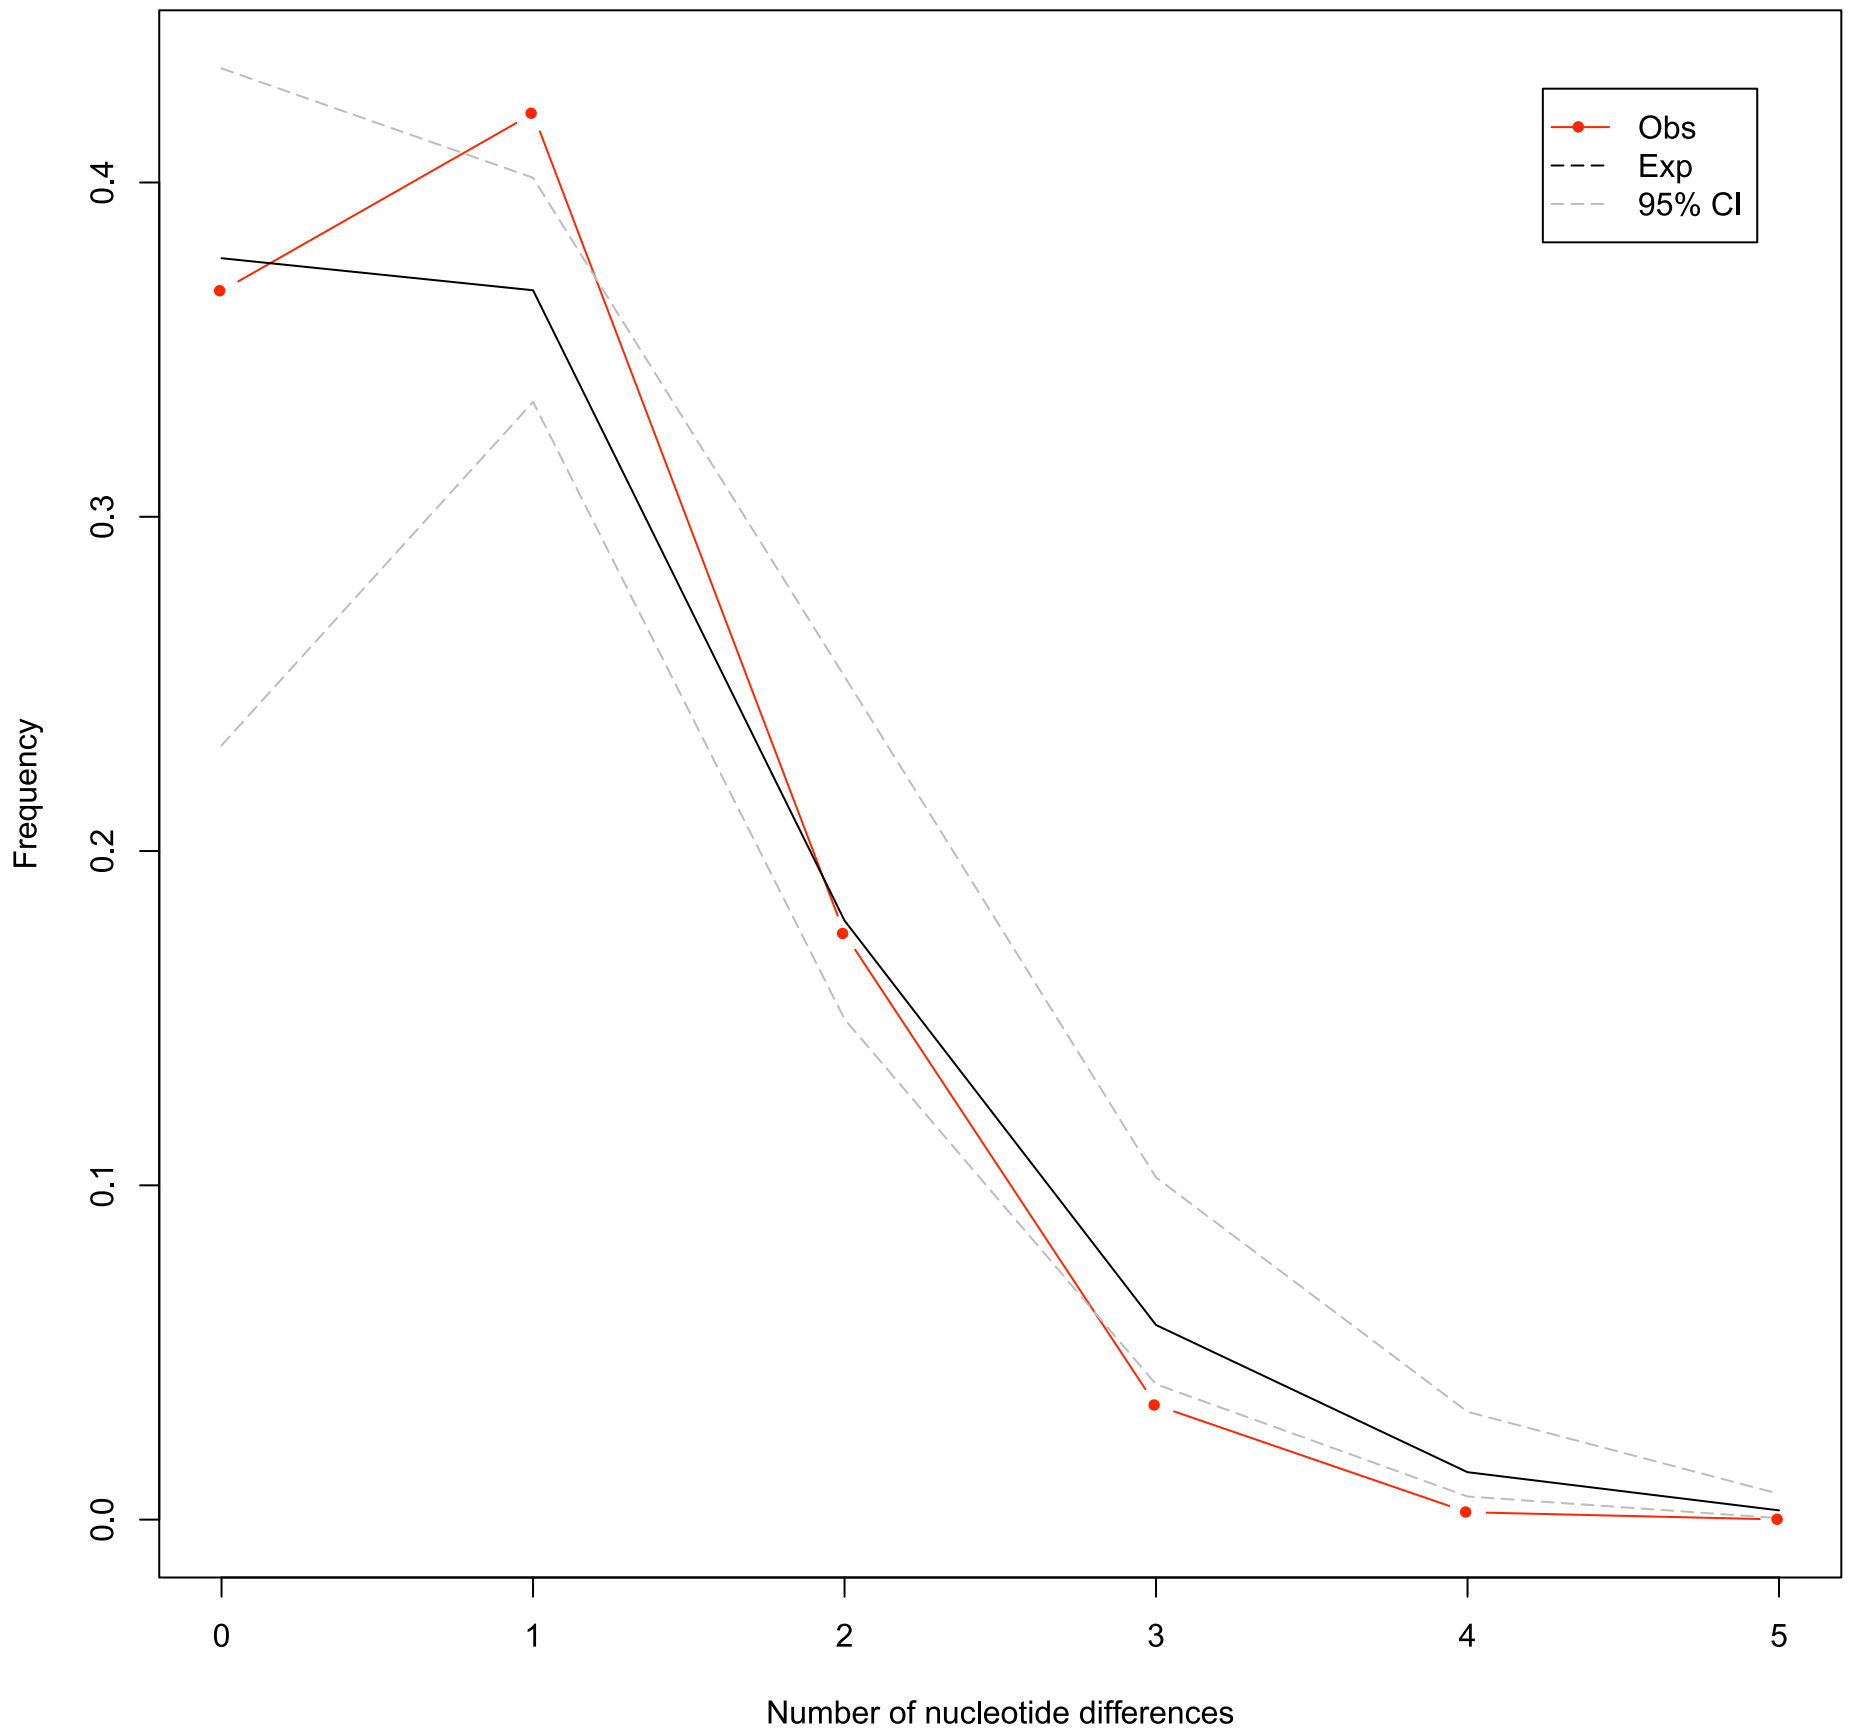

**Fig. S2** Mismatch distribution of the chloroplast haplotypes. The solid red line with points is the observed mismatch distribution, the solid black line is the simulated mismatch distribution of the demographic expansion model, and the dashed grey lines indicate the 95% CI of the simulated mismatch distribution.

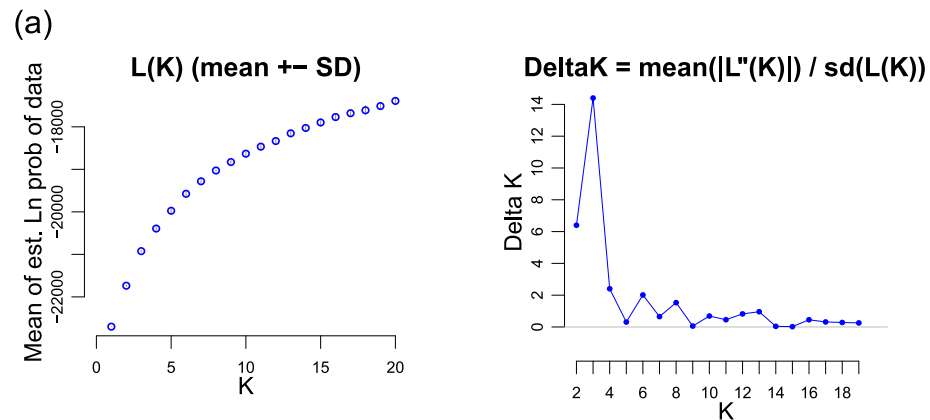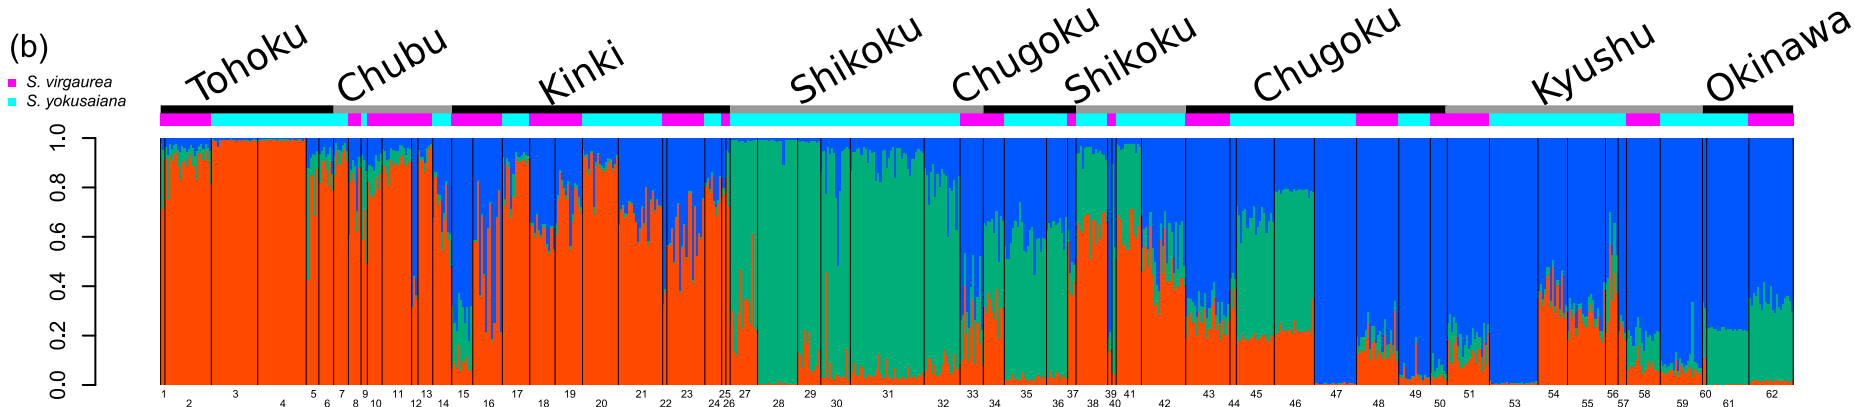

**Fig. S3** Bayesian clustering analysis of nSSR data. (a) Plot of  $L(K)$  and  $\Delta K$  values based on structure harvester. (b) Bar plot of the Q-matrix ( $K = 3$ ). The upper rectangles indicate where populations sampled. The middle rectangles indicate *S. virgaurea* (red) and *S. yokusaiana* (blue). The colors of the lower bar plot correspond to the colors in Fig. 3b.

(a)

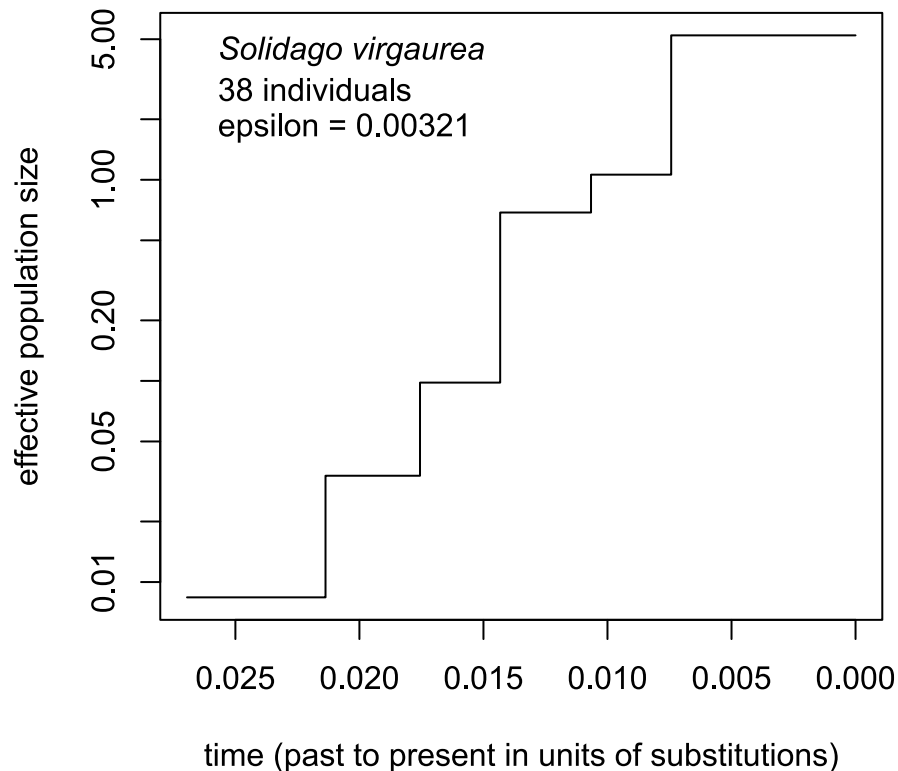

(b)

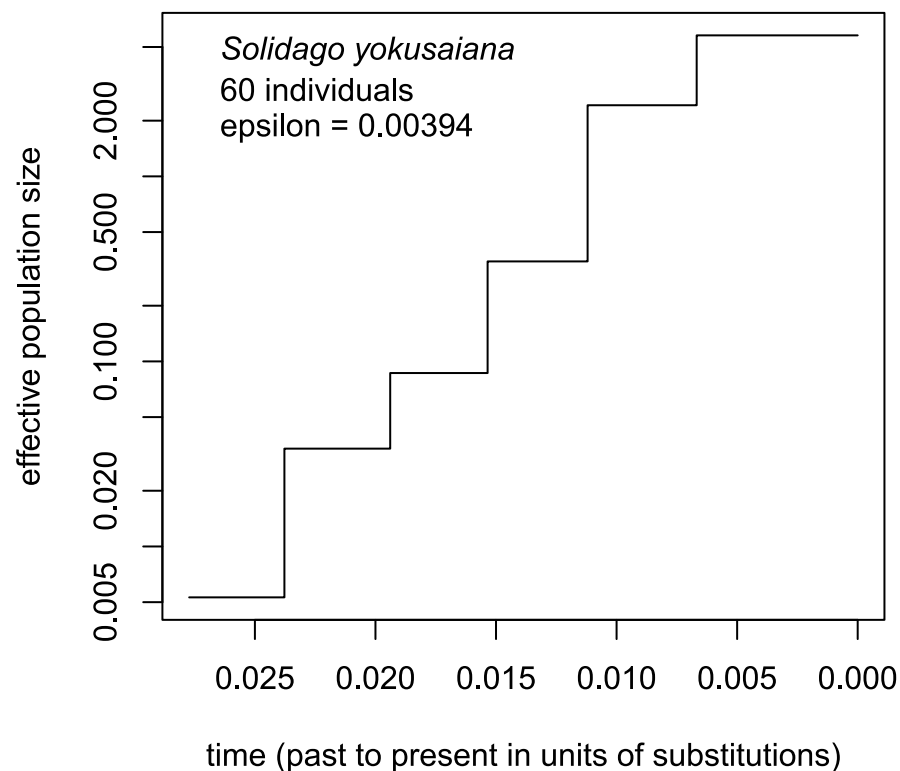

**Fig. S4** Generalized skyline plots for the UPGMA trees with the Hamming distance for (a) *S. virgaurea* ( $\epsilon = 0.00702$ ) and (b) *S. yokusaiana* ( $\epsilon = 0.00572$ ).

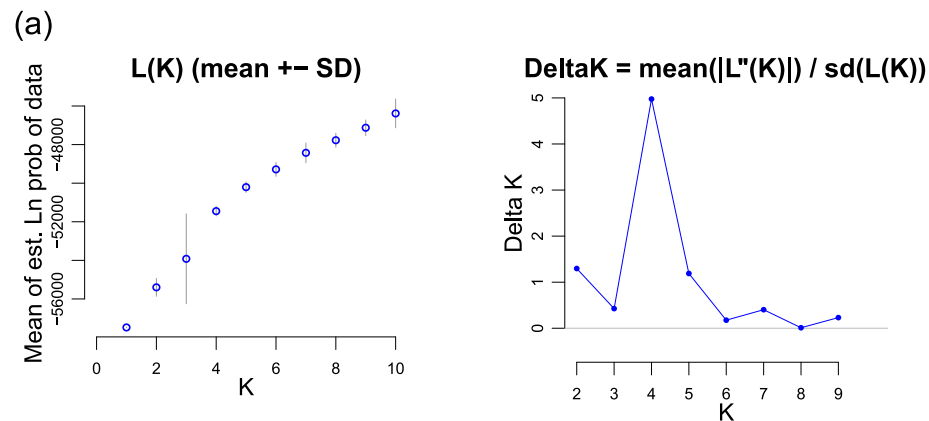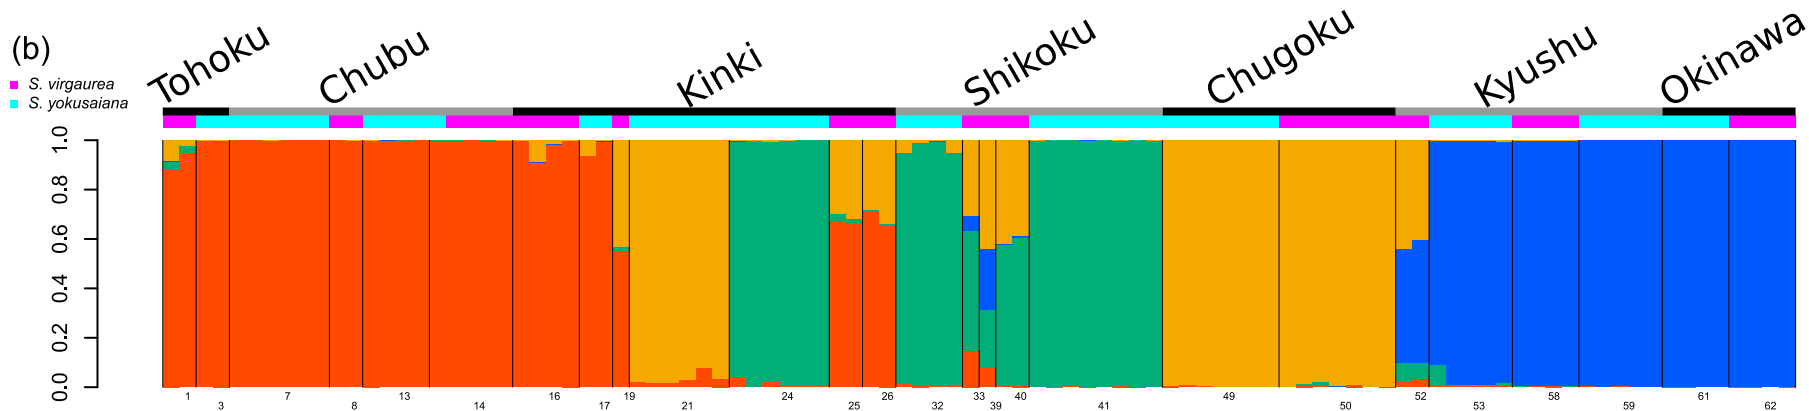

**Fig. S5** Bayesian clustering analysis of the ddRADseq data. (a) Plot of  $L(K)$  and  $\Delta K$  values based on structure harvester. (b) Bar plot of the Q-matrix ( $K = 4$ ). The upper rectangles indicate where populations sampled. The middle rectangles indicate *S. virgaurea* (red) and *S. yokusaiana* (blue). The colors of the lower bar plot correspond to the colors in Fig. 3c.

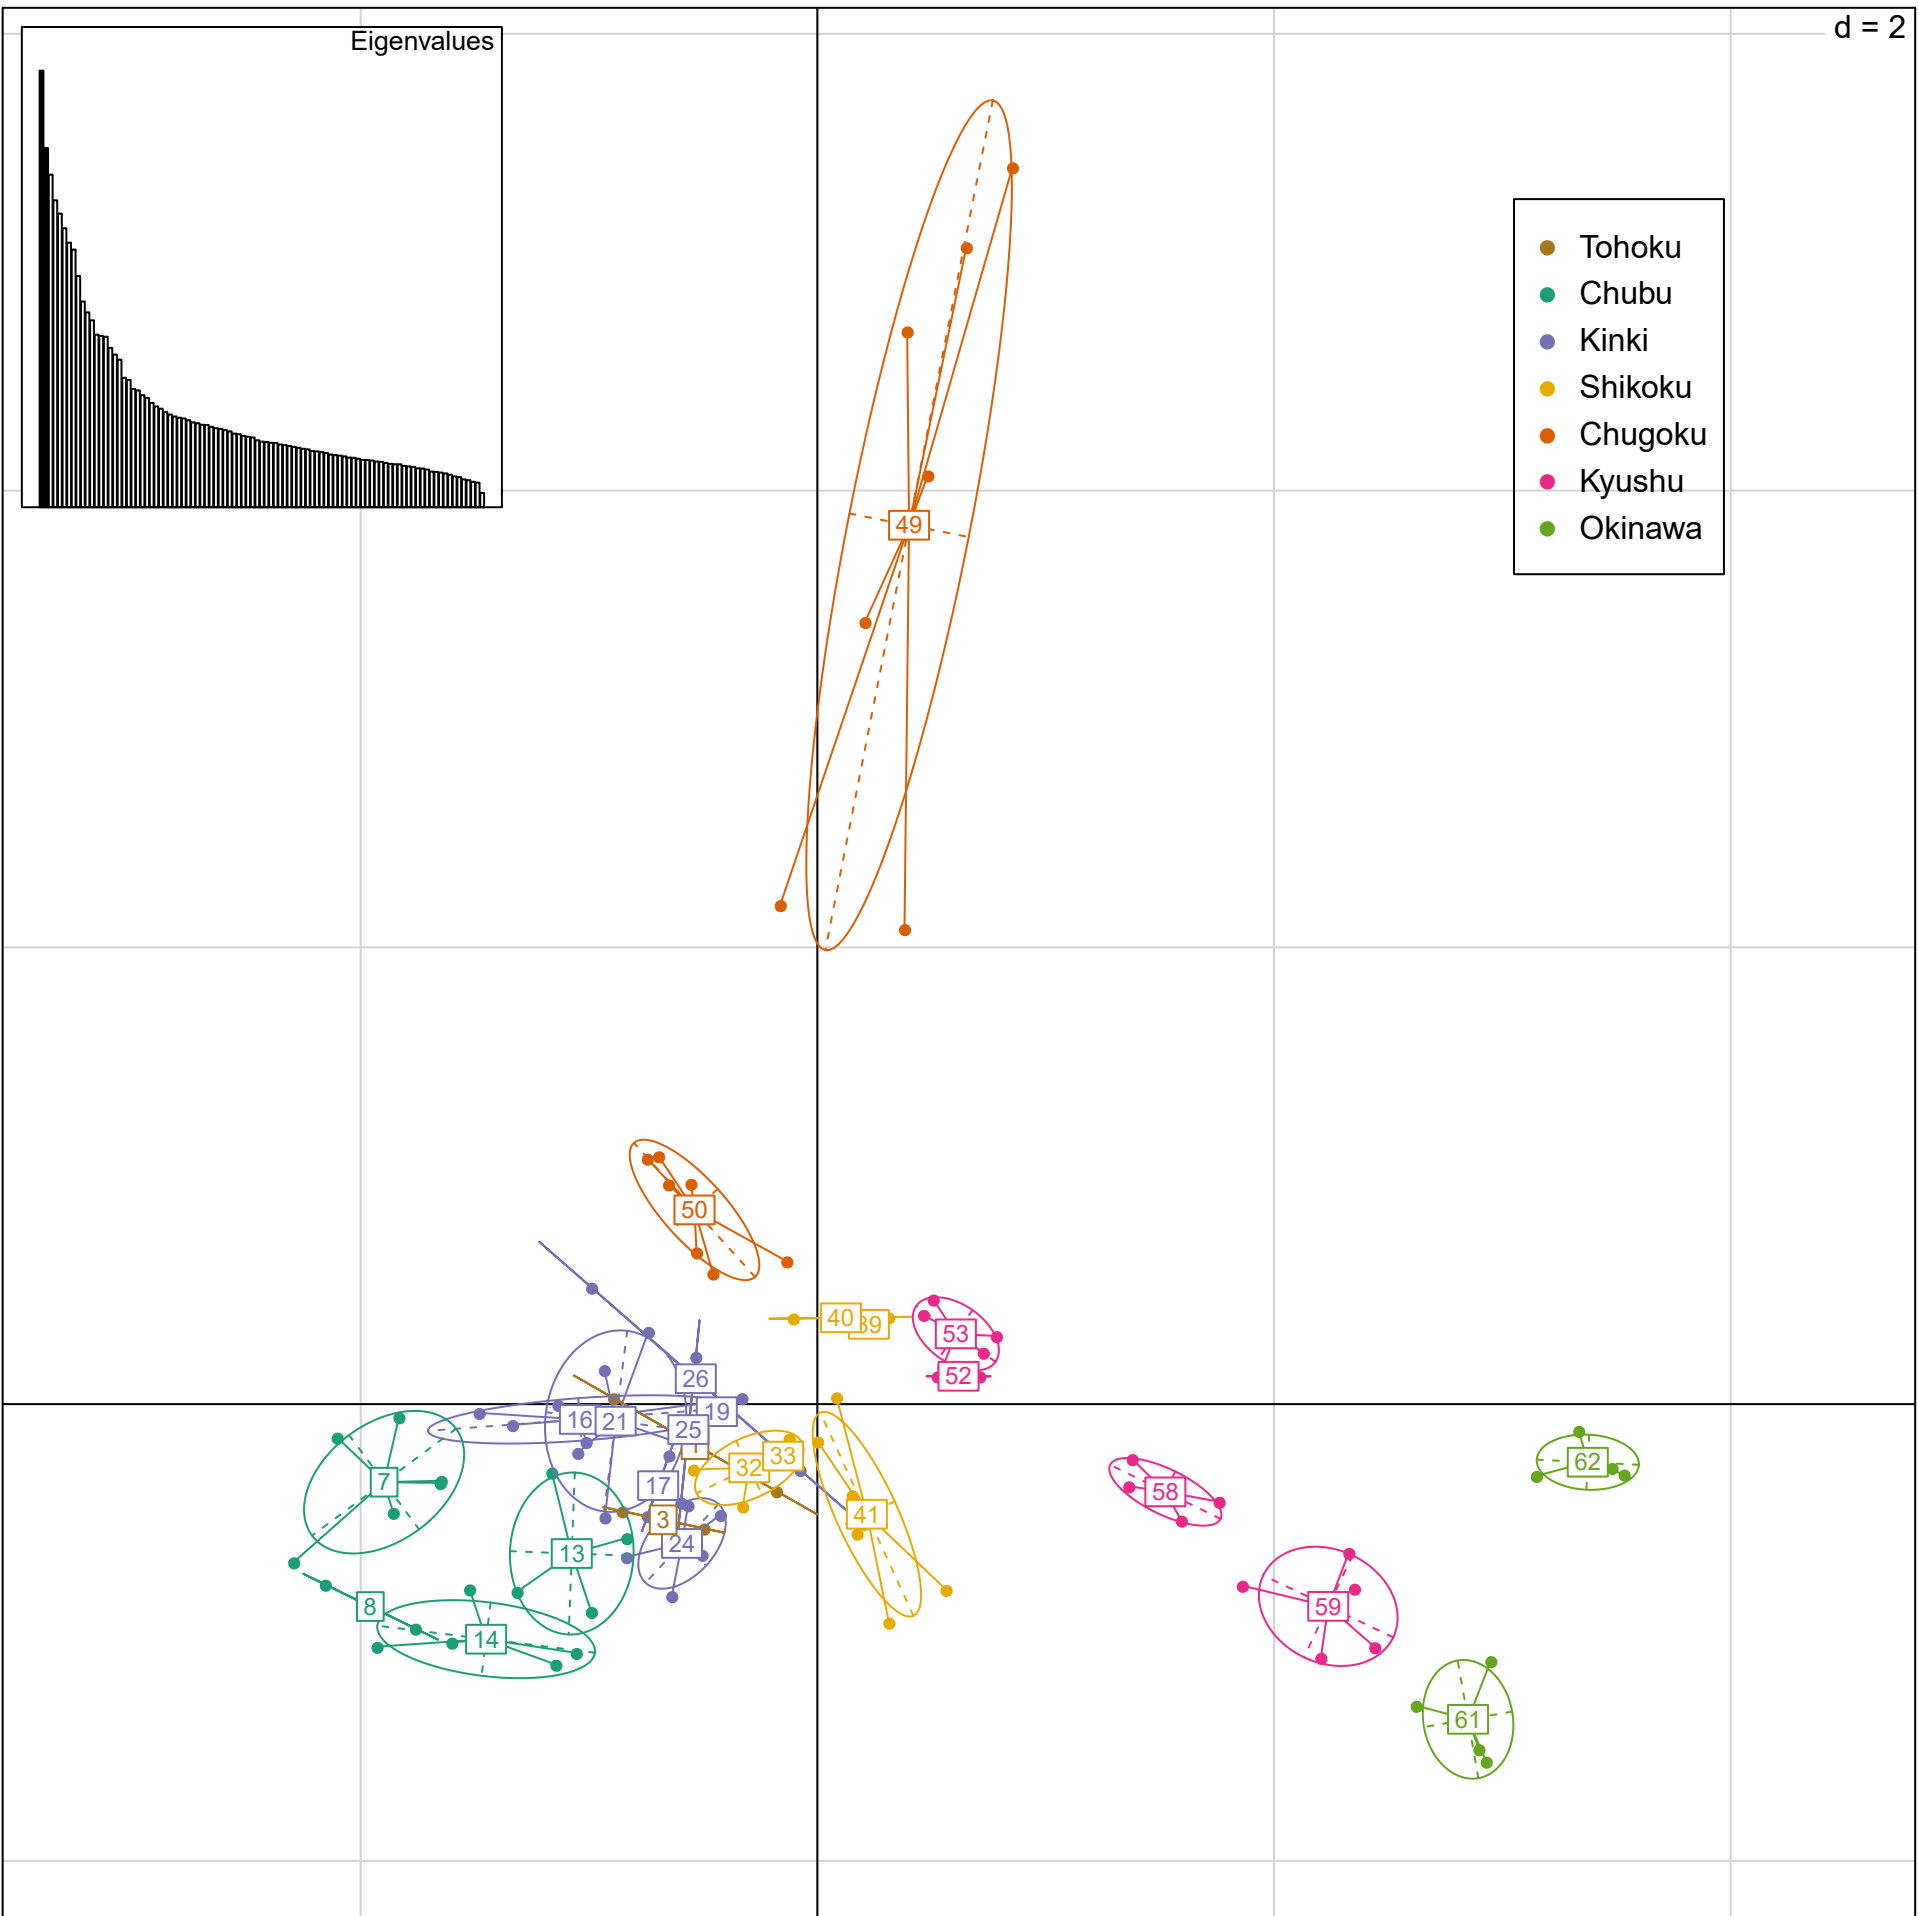

**Fig. S6** Principal components analysis of the ddRADseq data. The ellipses correspond to populations, and colors indicate districts where populations sampled. Top-left bar plot indicates eigenvalues.

Table S2 Summary of nSSR loci and its primer sequence.

| Locus       | Repeat motif        | Primer sequence (5'-3')                                | Reference              |
|-------------|---------------------|--------------------------------------------------------|------------------------|
| Sol_2001876 | (ATC) <sub>8</sub>  | F: AAGCTCATGGGTCCTCTGC<br>R: ATCAAGCCAAAGCAGCTCG       | Sakaguchi and Ito 2014 |
| Sol_2003053 | (GAT) <sub>9</sub>  | F: TGAACCGACGGATGGAACC<br>R: TGGGAGCTGGACATGTTGG       | Sakaguchi and Ito 2014 |
| Sol_2003631 | (GAT) <sub>10</sub> | F: CACCAGGCATGATCTGAAGC<br>R: CACCCTATCCACAATGCCAC     | Sakaguchi and Ito 2014 |
| Sol_2005991 | (GAT) <sub>11</sub> | F: TGC GGCTGACAATAATACACC<br>R: CCCAATTC CATCTGGGTTTC  | Sakaguchi and Ito 2014 |
| Sol_2006931 | (AC) <sub>10</sub>  | F: CTCTGCACCTCTTATCTGGAC<br>R: AGCCACGTTTCGTCGTTTG     | Sakaguchi and Ito 2014 |
| Sol_2007258 | (GAT) <sub>12</sub> | F: CGGAAGTGGGTTTGGATCG<br>R: CATGCACGCTATGACTCGG       | Sakaguchi and Ito 2014 |
| Sol_2007556 | (AAG) <sub>9</sub>  | F: GCGTCGGCGCTTCATATC<br>R: TTCCAACGCCTGAATCCC         | Sakaguchi and Ito 2014 |
| Sol_2012220 | (AC) <sub>12</sub>  | F: GGCCCGGATGGTTGATTTTC<br>R: GCCGAAACACCAAGGCTC       | Sakaguchi and Ito 2014 |
| Sol_2013075 | (CT) <sub>10</sub>  | F: TCATGTGAAGACACGATCCG<br>R: CAAGATAAGGCAAGCTCCCAC    | Sakaguchi and Ito 2014 |
| Sol_2013411 | (GAT) <sub>10</sub> | F: TGTTGTGAAGAAAGTGGATACTC<br>R: CCTTGCCAACAAAGCTTGC   | Sakaguchi and Ito 2014 |
| Sol_2071098 | (CT) <sub>11</sub>  | F: TCTTGGAGGTGAGGAAAGCC<br>R: TGGTGTGCGTTCAAGGTTTC     | Sakaguchi and Ito 2014 |
| Salt1       | (ATT) <sub>15</sub> | F: ACTACTGGCGGCGTAACAG<br>R: CCGCCGGTTTCAATGTTGG       | Sakata et al. 2013     |
| Salt3       | (ATT) <sub>14</sub> | F: GAAGAAGAGCTTCGGATGTTGT<br>R: CGCCTAAATTGACTTGACACAG | Sakata et al. 2013     |
| Salt17      | (ACC) <sub>8</sub>  | F: GCACCTTCTCCAAATGCCG<br>R: TGTCCGCTGATACCAGTCC       | Sakata et al. 2013     |
